# Supplementary material for: Differential Species Richness and Ecological Success of Epiphytes and Hemiepiphytes of Neotropical Araceae and Cyclanthaceae
Source: MDPI journal article supplement (doi:10.3390/plants12234004), 2023-11-28
Supplement: s1 [file s1]

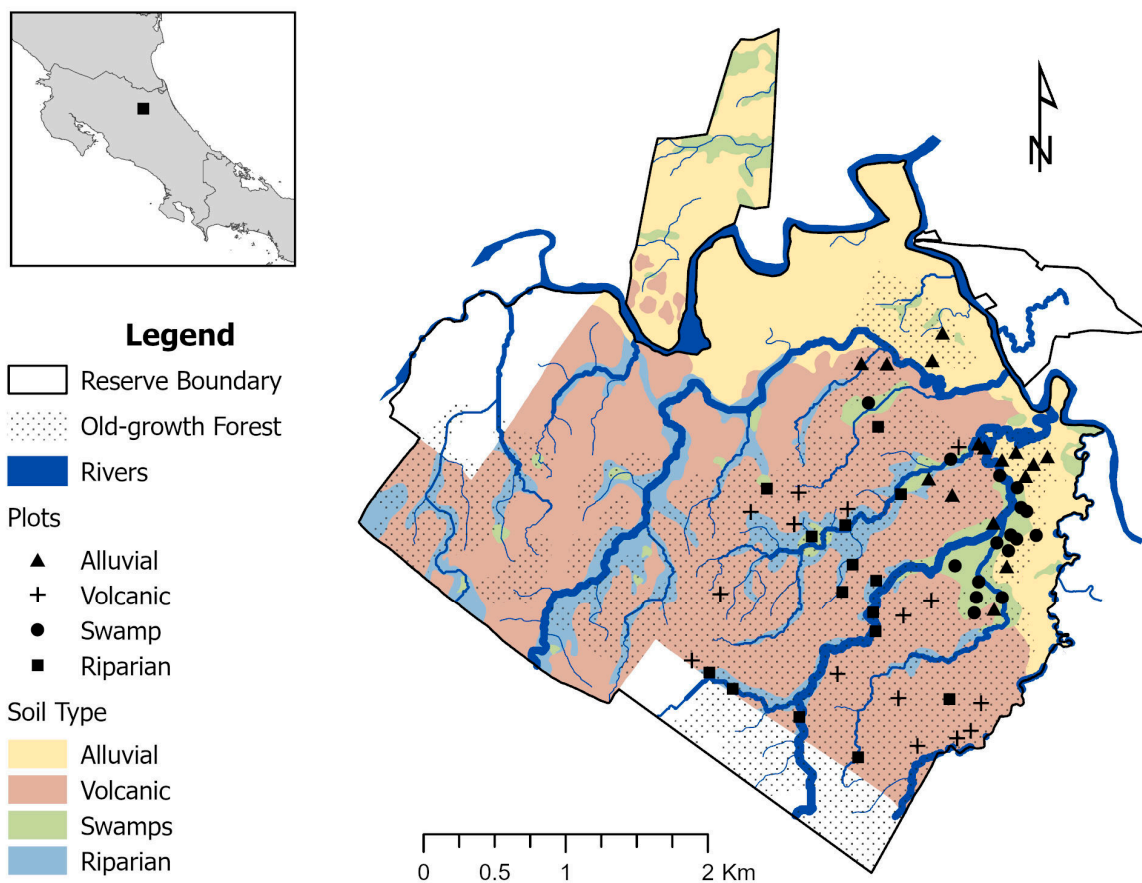

Figure S1: La Selva Biological Station soils map with plot locations. Plot locations indicated by circles (swamp), riparian (square), residual uplands (square), and alluvial lowland (triangle).
