# Supplementary material for: Differential Species Richness and Ecological Success of Epiphytes and Hemiepiphytes of Neotropical Araceae and Cyclanthaceae
Source: Plants (Basel). 2023 Nov 28;12(23):4004. doi: 10.3390/plants12234004 (PMC10708273; doi:10.3390/plants12234004)
Supplement: Supplementary file 1 [file plants-12-04004-s001.zip › plants-2646211-Supplementary Table S1.xlsx]

## Sheet: speciesOccurrence
siteID	soil	Ntrees	Anacu	Anaus	Anbak	Anbra	Ancon	Ancus	Anfri	Angra	Anlla	Anobt	Anram	Anspa	Anupa	Phdav	Phwen	Ancla	Anfle	Anfro	Anint	Anpen	Ansub	Antri	Phall	Pharo	Phaur	Phbre	Phbru	Phcre	Phfra	Phgra	Phhed	Phher	Phina	Phjod	Phlig	Phopa	Phpla	Phrad	Phrho	Phrig	Phrot	Phsag	Phsch	Phsul	Phten	Phtri	Rhpel
1000,1500	alluvial	50	0	0	1	0	0	3	0	0	0	0	2	0	0	0	1	1	0	0	1	0	0	0	22	2	0	0	0	5	0	0	0	11	1	3	0	0	7	1	12	0	0	0	0	1	0	1	0
1100,1350	alluvial	41	0	0	5	0	13	0	1	0	0	0	3	0	3	0	2	0	0	0	0	2	0	0	16	1	0	0	0	0	0	0	2	2	8	2	0	0	4	3	0	3	0	0	2	0	0	3	0
1000,100	alluvial	73	0	0	6	2	18	1	0	0	1	0	2	0	1	0	0	0	0	0	1	1	0	0	32	1	0	0	0	1	0	0	0	1	5	0	0	0	4	0	7	2	0	0	1	0	0	0	0
900,250	alluvial	56	1	0	6	0	14	0	0	0	4	0	1	0	0	0	0	3	0	0	0	2	1	0	9	0	0	0	0	0	0	0	0	0	0	5	0	0	1	1	0	0	1	0	3	0	0	2	0
1400,1150	alluvial	80	0	0	9	0	17	3	0	0	0	0	7	2	2	1	3	6	0	0	2	0	0	0	31	4	0	0	1	3	0	0	0	3	2	7	0	0	16	1	3	2	0	2	6	0	0	5	0
1400,1500	alluvial	44	0	0	9	1	14	1	0	0	0	0	5	0	2	0	3	2	0	0	0	2	0	0	17	4	2	0	0	0	0	0	1	7	7	5	0	0	9	4	0	3	1	0	0	2	1	4	0
1600,1750	alluvial	68	0	0	8	0	16	1	0	0	0	0	3	0	1	0	0	2	0	0	4	2	0	0	29	2	0	0	0	0	0	0	0	0	9	3	0	0	0	1	0	0	0	0	9	1	0	1	0
800,1550	alluvial	43	0	0	2	0	5	1	0	0	0	0	3	1	1	0	0	1	0	0	0	2	0	0	10	2	0	0	0	0	0	0	0	7	5	7	0	0	0	0	5	0	1	0	2	0	0	1	1
500,450	alluvial	49	4	1	4	0	13	2	0	0	0	0	3	0	0	0	0	1	0	0	1	1	0	0	18	4	0	0	0	0	0	0	0	2	4	4	0	0	1	2	0	0	0	0	2	0	0	7	0
1900,1850	alluvial	106	1	2	7	0	23	0	0	0	0	0	3	0	0	0	1	7	0	1	4	1	2	0	18	1	0	0	0	2	0	0	0	0	4	8	0	0	5	2	0	3	0	1	4	0	0	6	0
1400,950	alluvial	66	0	0	12	0	16	0	0	0	0	0	1	1	1	0	0	1	0	3	5	0	1	0	25	1	0	0	0	1	0	0	0	5	3	6	0	0	4	2	1	5	0	4	0	2	1	1	0
1000,1125	alluvial	68	3	0	4	0	7	1	0	0	0	0	1	0	3	0	0	9	1	0	1	3	4	0	6	2	17	0	0	0	0	1	0	0	27	4	0	0	1	6	0	0	1	0	0	2	0	4	0
900,1500	alluvial	29	0	0	10	0	11	3	0	0	0	0	6	1	0	0	2	0	0	3	3	0	0	1	19	3	0	0	0	1	0	0	0	2	0	4	0	0	6	0	7	0	0	0	0	0	1	2	0
1000,1300	alluvial	44	0	0	5	0	7	0	0	0	0	0	2	1	0	0	0	1	0	0	0	0	0	0	10	1	0	0	0	0	0	0	0	8	3	6	0	0	5	0	0	0	0	0	2	0	0	0	0
700,500	alluvial	70	0	0	2	0	8	1	0	0	0	0	0	0	1	0	0	0	0	0	1	1	1	0	29	1	0	0	0	0	0	0	0	14	3	1	0	0	7	4	10	0	0	0	0	0	1	12	0
2800,1650	residual	70	0	1	11	0	15	3	0	0	0	0	3	0	2	0	0	2	0	5	2	1	3	1	31	3	0	0	0	0	0	0	0	3	13	6	1	0	9	0	0	7	0	0	3	2	0	3	0
2900,1200	residual	65	0	2	5	0	16	0	0	0	0	0	0	1	0	1	0	1	0	0	0	0	0	0	18	7	0	0	0	0	0	0	0	0	2	10	0	0	8	3	0	14	1	1	16	0	0	4	2
2100,1450	residual	75	0	0	16	1	28	2	0	0	0	0	7	2	3	1	0	1	0	3	2	2	0	4	30	2	0	0	0	7	0	0	1	6	4	13	0	0	12	3	1	7	0	2	15	0	0	4	0
3400,300	residual	74	0	0	4	0	10	0	0	0	0	0	1	0	0	0	0	0	0	2	0	1	0	5	37	0	0	0	0	0	0	0	0	7	2	6	0	0	8	0	2	1	0	0	0	0	0	2	0
2900,200	residual	105	0	0	2	0	12	0	0	0	1	0	0	0	0	1	0	1	0	0	0	3	0	0	17	3	0	0	0	0	24	0	0	0	1	5	0	0	0	0	0	27	0	0	4	0	0	0	0
2800,2150	residual	100	0	0	3	0	6	0	2	0	0	0	0	2	1	0	1	0	0	0	0	5	0	0	9	3	0	0	0	1	34	0	0	1	0	7	0	0	0	0	1	2	0	0	0	0	0	1	0
2500,2150	residual	85	0	0	3	0	14	0	0	0	0	0	0	0	0	0	0	0	0	0	0	5	0	0	20	0	0	0	0	0	16	0	0	0	0	8	0	0	1	2	0	11	0	0	9	2	0	2	0
2300,1350	residual	57	0	3	9	0	18	0	0	0	0	0	3	1	0	0	2	1	0	0	2	1	0	0	18	1	0	0	0	1	0	0	0	0	8	4	0	2	2	0	2	5	1	4	9	0	0	6	0
1100,1000	residual	104	1	0	2	0	15	0	1	0	0	0	1	2	0	0	0	2	0	1	0	0	0	0	21	1	0	0	0	0	0	0	0	1	4	4	0	0	0	0	0	3	1	1	7	0	0	1	0
1900,600	residual	70	0	1	3	0	15	0	0	0	1	0	6	0	1	0	2	1	0	0	0	1	0	0	18	1	0	0	0	0	0	0	0	0	0	2	1	0	0	2	0	15	0	0	0	0	0	6	0
2000,250	residual	74	0	0	2	0	17	0	0	0	1	0	0	1	0	0	0	1	0	1	1	6	1	0	36	3	0	0	0	0	0	0	0	0	4	8	0	0	3	4	0	8	0	0	0	0	0	0	0
2200,350	residual	68	1	2	5	0	15	0	0	1	3	0	2	1	3	1	1	0	0	0	1	2	0	0	18	4	0	0	0	0	0	0	0	0	1	2	0	0	2	1	0	4	0	2	1	0	0	0	0
3000,1950	residual	89	2	0	4	0	18	0	3	0	0	0	0	0	1	0	0	1	0	0	2	3	1	0	19	3	0	0	0	0	11	0	0	2	4	4	0	0	0	1	0	5	0	0	1	0	0	1	0
2700,2200	residual	60	0	1	1	0	17	0	0	0	0	0	2	1	0	0	0	0	0	0	0	0	0	0	6	0	0	0	0	0	8	0	0	0	4	3	0	0	1	0	0	8	0	0	0	0	0	0	0
2300,50	residual	66	0	0	0	0	12	0	0	0	3	0	2	0	1	0	0	0	0	0	0	1	0	0	7	1	0	0	0	0	28	0	0	0	5	6	0	0	1	0	0	0	0	0	3	0	0	2	0
2500,1250	stream	54	0	0	5	0	4	1	0	0	0	0	0	0	0	0	1	0	0	4	0	1	0	8	22	2	0	0	1	1	0	2	0	1	0	1	0	3	7	0	3	0	0	0	0	0	0	3	0
2100,50	stream	49	1	0	9	0	1	10	0	0	1	0	1	0	0	0	0	0	0	0	0	4	1	1	9	0	0	0	0	1	0	0	0	3	6	1	1	0	2	1	5	0	0	0	1	0	0	1	0
3400,650	stream	55	0	1	5	0	7	1	0	0	0	0	2	1	2	0	1	0	0	1	1	1	0	14	23	4	1	0	0	5	0	0	0	2	0	1	0	0	6	1	1	0	0	0	0	0	0	3	0
2600,1950	stream	59	0	0	3	0	2	0	0	0	0	0	1	0	0	0	0	1	0	0	0	1	0	4	16	0	0	0	0	0	0	0	0	1	2	3	0	0	5	0	4	0	0	0	1	1	0	1	0
2000,650	stream	86	0	2	1	0	11	0	0	0	0	0	4	1	0	1	1	0	0	1	0	1	0	0	29	1	0	0	1	2	0	0	0	3	1	6	1	0	9	1	4	4	0	1	0	0	0	6	0
1300,450	stream	43	1	0	8	0	12	2	0	0	0	0	1	2	1	2	1	1	0	1	0	2	3	2	16	3	0	0	0	0	0	0	0	2	0	6	0	0	8	1	0	0	0	0	0	0	0	0	0
2200,500	stream	43	0	0	4	0	8	2	0	0	0	0	3	0	1	0	1	0	0	1	2	0	0	2	14	6	0	0	0	5	0	0	0	0	0	4	0	0	11	0	5	5	0	0	0	0	0	3	0
2200,1050	stream	50	0	0	3	0	2	0	0	0	0	0	0	0	0	0	0	2	0	0	0	0	2	0	14	0	0	0	0	0	0	0	1	0	4	0	0	5	0	0	0	0	0	0	1	0	0	1	2
2200,850	stream	49	0	0	9	0	9	7	0	0	0	0	1	0	0	0	0	1	0	3	1	1	1	7	24	2	7	0	3	2	0	0	1	13	0	3	0	0	8	4	0	0	0	1	4	1	0	1	0
2400,900	stream	28	0	0	2	0	2	1	0	0	0	0	1	0	0	0	1	0	0	1	0	0	0	1	16	2	0	0	0	1	0	0	0	0	0	0	0	0	0	0	6	3	0	0	0	0	0	1	0
1600,850	stream	67	0	0	4	1	7	1	0	0	0	0	3	0	0	0	0	1	0	1	2	0	0	0	29	0	0	0	0	1	0	0	0	6	8	2	0	0	4	1	3	4	0	1	0	1	1	6	0
3300,1650	stream	46	0	0	6	0	7	2	0	0	0	0	0	0	1	0	1	0	0	0	1	0	0	6	28	0	0	0	2	2	0	0	0	4	0	1	0	0	10	1	2	0	0	0	0	1	0	4	0
3300,1150	stream	30	0	2	6	0	3	0	0	0	0	0	0	0	0	0	1	0	0	3	0	0	0	5	20	0	0	0	0	3	0	0	0	3	0	1	0	0	4	0	0	1	0	1	0	0	0	2	0
2400,1150	stream	69	0	0	10	1	7	2	0	0	0	0	0	0	1	0	0	0	0	4	1	1	0	3	18	0	2	0	0	1	0	0	0	1	2	0	0	1	7	0	6	0	0	0	22	0	0	2	2
3400,450	stream	48	0	1	4	0	6	0	0	0	0	0	0	0	0	0	0	0	0	0	0	0	1	0	18	0	0	0	0	1	0	0	0	1	2	3	0	0	7	0	2	0	0	1	4	0	0	2	0
1800,1850	swamp	54	0	0	24	1	20	8	2	0	0	0	6	2	4	2	6	6	0	4	3	0	8	7	37	5	5	1	1	1	0	0	1	6	0	8	0	0	20	4	4	2	0	2	6	1	2	5	11
1200,1000	swamp	85	1	2	14	0	16	2	0	0	0	0	5	0	2	1	8	3	0	5	0	1	2	0	43	1	13	0	0	1	0	0	0	0	5	5	0	0	13	1	9	1	0	1	0	1	0	2	1
1100,1350	swamp	48	0	0	6	0	18	2	0	0	0	0	3	0	4	0	3	5	0	4	1	1	3	0	23	2	1	0	0	1	0	0	0	6	2	3	3	4	6	3	8	0	0	0	4	4	1	9	1
1100,1500	swamp	69	0	0	6	0	28	2	0	0	0	0	3	1	1	0	0	4	0	5	2	1	0	0	39	3	0	0	0	0	0	0	0	4	4	5	0	0	3	3	1	0	0	2	9	1	0	3	0
1400,1700	swamp	59	0	0	6	0	5	2	0	0	0	0	3	0	1	0	0	1	0	1	1	0	6	1	29	2	1	0	3	1	0	1	1	3	1	4	0	0	8	2	8	1	0	0	0	0	1	0	0
2000,1750	swamp	62	0	0	7	0	4	4	0	0	0	0	0	0	0	1	0	2	0	2	0	0	0	4	34	1	0	0	0	1	0	1	0	3	0	5	0	0	6	1	5	1	0	2	0	0	0	1	2
1900,1700	swamp	42	0	0	18	0	6	2	0	0	0	0	3	0	2	1	1	0	0	11	0	0	0	6	32	5	2	0	0	0	0	0	0	1	2	0	0	0	14	0	1	0	0	0	0	0	0	5	0
1800,1450	swamp	60	0	0	7	0	11	0	0	0	0	0	1	2	1	1	0	1	0	4	1	0	0	0	31	2	1	0	0	2	0	1	1	0	1	6	0	0	8	2	6	3	0	2	1	0	1	3	4
1800,1650	swamp	88	0	0	9	0	11	0	0	0	0	0	4	1	2	0	0	8	0	2	1	0	2	2	49	2	10	0	0	1	0	0	0	0	3	10	0	0	5	2	2	0	0	0	1	1	3	1	4
1400,1650	swamp	58	0	0	11	0	13	4	0	0	0	0	1	1	1	0	0	0	0	1	5	0	3	2	31	2	1	0	0	2	0	0	0	4	2	5	0	0	10	0	5	1	0	0	1	6	1	4	4
1200,300	swamp	31	0	0	6	0	15	0	0	0	0	0	2	0	1	0	0	0	0	1	0	0	0	0	10	0	4	0	0	0	0	0	0	0	4	2	1	0	2	0	7	1	0	1	0	9	0	1	0
1300,1800	swamp	40	0	0	4	0	8	1	0	0	0	0	3	1	2	1	1	0	0	1	1	0	0	0	25	2	0	0	0	1	0	1	1	0	2	3	0	0	3	2	2	0	0	0	2	1	0	6	0
1200,1600	swamp	30	0	0	5	0	11	5	0	0	0	0	8	1	4	2	5	4	0	3	4	0	2	0	25	4	2	0	0	1	0	0	0	1	7	1	0	0	6	3	10	1	0	0	1	0	1	2	3
1200,1650	swamp	34	0	0	5	1	6	3	0	0	0	0	1	1	3	0	2	2	0	1	1	0	5	0	20	1	6	0	0	0	0	0	0	13	5	3	0	0	7	2	3	0	0	0	0	0	0	4	0
1500,1700	swamp	35	0	0	9	0	8	2	0	0	0	2	3	0	1	1	1	2	0	2	1	0	1	2	22	1	0	0	0	0	0	0	0	0	4	4	0	12	7	2	5	0	0	0	0	2	0	1	1
1500,1600	swamp	51	0	0	14	0	10	2	0	0	0	0	2	0	1	0	2	0	0	6	1	0	4	6	22	3	2	0	0	1	0	2	1	5	1	6	0	0	12	2	10	1	0	0	0	4	0	6	4
[truncated: 18 more columns]

## Sheet: speciesCode
family	species	speciesCode	growthForm
Araceae	Anthurium acutangulum	Anacu	epiphyte
Araceae	Anthurium austin-smithii	Anaus	epiphyte
Araceae	Anthurium bakeri	Anbak	epiphyte
Araceae	Anthurium bradeanum	Anbra	epiphyte
Araceae	Anthurium clavigerum	Ancla	epiphyte
Araceae	Anthurium consobrinum	Ancon	epiphyte
Araceae	Anthurium cuspidatum	Ancus	epiphyte
Araceae	Anthurium friedrichsthalii	Anfri	epiphyte
Araceae	Anthurium gracile	Angra	epiphyte
Araceae	Anthurium llanense	Anlla	epiphyte
Araceae	Anthurium obtusum	Anobt	epiphyte
Araceae	Anthurium ramonense	Anram	epiphyte
Araceae	Anthurium spathiphyllum	Anspa	epiphyte
Araceae	Anthurium upalaense	Anupa	epiphyte
Araceae	Philodendron radiatum	Phrad	epiphyte
Araceae	Philodendron wendlandii	Phwen	epiphyte
Cyclanthaceae	Chorigyne pendula	Chpen	epiphyte
Cyclanthaceae	Sphaeradenia acutitepala	Spacu	epiphyte
Araceae	Anthurium flexile	Anfle	hemiepiphyte
Araceae	Anthurium formosum	Anfro	hemiepiphyte
Araceae	Anthurium interruptum	Anint	hemiepiphyte
Araceae	Anthurium pentaphyllum	Anpen	hemiepiphyte
Araceae	Anthurium subsignatum	Ansub	hemiepiphyte
Araceae	Anthurium trisectum	Antri	hemiepiphyte
Araceae	Philodendron alliodorum	Phall	hemiepiphyte
Araceae	Philodendron aromaticum	Pharo	hemiepiphyte
Araceae	Philodendron aurantiifolium	Phaur	hemiepiphyte
Araceae	Philodendron brevispathum	Phbre	hemiepiphyte
Araceae	Philodendron brunneicaule	Phbru	hemiepiphyte
Araceae	Philodendron cretosum	Phcre	hemiepiphyte
Araceae	Philodendron davidsonii	Phdav	hemiepiphyte
Araceae	Philodendron fragrantissimum	Phfra	hemiepiphyte
Araceae	Philodendron grandipes	Phgra	terrestrial herb
Araceae	Philodendron hederaceum	Phhed	hemiepiphyte
Araceae	Philodendron herbaceum	Phher	hemiepiphyte
Araceae	Philodendron inaequilaterum	Phina	hemiepiphyte
Araceae	Philodendron jodavisianum	Phjod	hemiepiphyte
Araceae	Philodendron ligulatum	Phlig	hemiepiphyte
Araceae	Philodendron opacum	Phopa	hemiepiphyte
Araceae	Philodendron platypetiolatum	Phpla	hemiepiphyte
Araceae	Philodendron rhodoaxis	Phrho	hemiepiphyte
Araceae	Philodendron rigidifolium	Phrig	hemiepiphyte
Araceae	Philodendron rothschuhianum	Phrot	hemiepiphyte
Araceae	Philodendron sagittifolium	Phsag	hemiepiphyte
Araceae	Philodendron schottii	Phsch	hemiepiphyte
Araceae	Philodendron sulcatum	Phsul	hemiepiphyte
Araceae	Philodendron tenue	Phten	hemiepiphyte
Araceae	Philodendron tripartitum	Phtri	hemiepiphyte
Araceae	Rhodospatha pellucida	Rhpel	hemiepiphyte
Araceae	Rhodospatha wendlandii	Rhwen	hemiepiphyte
Araceae	Syngonium hoffmannii	Syhof	hemiepiphyte
Araceae	Syngonium macrophyllum	Symac	hemiepiphyte
Araceae	Syngonium peliocladum	Sypel	hemiepiphyte
Araceae	Syngonium rayi	Syray	hemiepiphyte
Araceae	Syngonium schottianum	Sysch	hemiepiphyte
Araceae	Syngonium triphyllum	Sytri	hemiepiphyte
Cyclanthaceae	Asplundia euryspatha	Aseur	hemiepiphyte
Cyclanthaceae	Asplundia ferruginea	Asfer	hemiepiphyte
Cyclanthaceae	Asplundia multistaminata	Asmul	hemiepiphyte
Cyclanthaceae	Asplundia uncinata	Asunc	terrestrial herb
Cyclanthaceae	Asplundia utilis	Asuti	hemiepiphyte
Cyclanthaceae	Evodianthus funifer	Evfun	hemiepiphyte
Cyclanthaceae	Ludovia integrifolia	Luint	epiphyte
Cyclanthaceae	Dicranopygium wedelii	Diwed	phreatophyte
Cyclanthaceae	Dicranopygium umbrophilum	Diumb	terrestrial herb
